# Supplementary material for: Three-steps in one-pot: whole-cell biocatalytic synthesis of enantiopure (+)- and (−)-pinoresinol via kinetic resolution
Source: PubMed Central journal article supplement (PMC4862135; doi:10.1186/s12934-016-0472-0), 2016-05-09
Supplement: 12934_2016_472_MOESM1_ESM.pdf [file 12934_2016_472_MOESM1_ESM.pdf]

## **Additional file 1: DNA-sequences of the synthetic genes (*syatpr2* and *syfiplr*), plasmids and strains used within this study.**

### ***syatpr2* (NCBI Reference Sequence NP\_193102.1):**

ATGAGTGGAGTCCATTTTCGCACGCACAATATTCCGGTCCAACCTAAGTTAGTCGCAGCC  
ATCAAAGAAGCCGGCAACGTGAAACGCTTCCTGCCAGTGAGTTTGGCATGGATCCTAGC  
CGCATGGGCCATGCAATGCCGCCAGGTAGCGAAACGTTTCGATCAGAAAATGGAGATCCGT  
AATGCCATCAAAGCAGCGGGCATCTCCCATACCTATTTAGTCGGCGCTTGCTTTGCGGCC  
TATTTTCGGTGGCAATCTGTCTCAGATGGGAACCCTCTTTCCGCCGAAGAACAAGTGGAC  
ATTTATGGCGATGGGAACGTGAAGGTAGTATTTGTGCGACGAAGATGACATGGCGAAATAC  
ACCGCGAAAACGCTGAATGACCCACGTACCCTGAACAAAACAGTCTATGTACGTCCTACG  
GATAACATCTTGACCCAGATGGAACCTTGTGCAGATTTGGGAGAACTGACCGAGAAAAGAA  
CTGGAAAAGACGTATGTGAGCGGTAATGACTTTCTGGCCGATATCGAAGATAAAGAGATT  
TCGCATCAAGCTGGCTTAGGTCACCTTACCACATTTACTACGAAGGCTGCCTGACCGAT  
CACGAAGTTGGTGACGATGAAGAAGCTACTAACTGTATCCGGATGTGAAATACAAGCGC  
ATGGACGAATATCTGAAAATTTTCGTCTGA

### ***syfiplr* (GenBank AAC49608.1):**

ATGCTGATTAGCTTCAAATGCAAGGTGCGCATCTGGTGAGTGGCTCCTTTAAAGACTTC  
AATAGCCTCGTTGAAGCGGTAAACTGGTAGATGTGGTTATTTCCGCAATCAGTGGCGTG  
CATATCCGCAGCCATCAGATTCTGTTACAGCTGAAACTTGTGGAAGCGATCAAAGAAGCT  
GGTAACGTTAAGCGCTTCTTACCGTCTGAATTCGGGATGGATCCTGCTAAATTCATGGAT  
ACCGCTATGGAACCCGGGAAAGTCACGTTAGACGAAAAGATGGTGGTACGCAAAGCCATT  
GAGAAAGCAGGAATCCCGTTTACCTATGTGTCAGCCAATTGCTTTGCCGGCTATTTTCTG  
GGAGGTCTGTGTCAGTTTGGGAAGATCCTCCATCACGGGATTTTCGTCATCATTTCATGGC  
GATGGGAACAAGAAAGCGATTTACAATAACGAGGATGACATTGCAACTTACGCGATCAA  
ACGATCAATGATCCGCGTACTTTGAACAAAACCATCTACATTAGCCCACCTAAGAACATC  
CTTAGCCAACCGGAAGTTGTGCAGACATGGGAGAACTGATTGGCAAAGAATTGCAGAAA  
ATTACGTTGTGCAAGGAGGACTTTCTGGCATCGGTGAAGGAACTGGAGTATGCGCAGCAA  
GTGGGTCTGAGTCACTATCATGATGTCAACTACCAGGGATGCTTAACCTCCTTTGAAATT  
GGCGATGAAGAGGAAGCCTCTAACTGTATCCGGAAGTGAATACACCTCTGTTGAAGAA  
TACCTTAAACGCTATGTTGGCGGTCATCACCATCATCACCACTGA

Strains and plasmids used within this study

| Strain or plasmid                        | Characteristics                                                                                                                                                                                                                                                                                                           | Source or reference                                                                      |
|------------------------------------------|---------------------------------------------------------------------------------------------------------------------------------------------------------------------------------------------------------------------------------------------------------------------------------------------------------------------------|------------------------------------------------------------------------------------------|
| <i>E. coli</i> DH5 $\alpha$              | F <sup>-</sup> $\Phi$ 80 <i>lacZ</i> $\Delta$ M15 $\Delta$ ( <i>lacZYA-argF</i> ) U169 <i>recA1 endA1 hsdR17</i> (r <sub>K</sub> <sup>-</sup> , m <sub>K</sub> <sup>+</sup> ) <i>phoA supE44 thi-1 gyrA96 relA1</i> $\lambda$ <sup>-</sup>                                                                                | Invitrogen                                                                               |
| <i>E. coli</i> BL21(DE3)                 | F <sup>-</sup> <i>ompT hsdS<sub>B</sub></i> (r <sub>B</sub> <sup>-</sup> m <sub>B</sub> <sup>-</sup> ) <i>gal dcm</i> (DE3)                                                                                                                                                                                               | Novagen                                                                                  |
| <i>E. coli</i> OverExpress C41(DE3)      | F <sup>-</sup> <i>ompT hsdS<sub>B</sub></i> (r <sub>B</sub> <sup>-</sup> m <sub>B</sub> <sup>-</sup> ) <i>gal dcm</i> (DE3)                                                                                                                                                                                               | Lucigen                                                                                  |
| <i>E. coli</i> OverExpress C43(DE3)      | F <sup>-</sup> <i>ompT hsdS<sub>B</sub></i> (r <sub>B</sub> <sup>-</sup> m <sub>B</sub> <sup>-</sup> ) <i>gal dcm</i> (DE3)                                                                                                                                                                                               | Lucigen                                                                                  |
| <i>E. coli</i> SHuffle® T7 Express       | <i>fhuA2 lacZ::T7 gene1</i> [lon] <i>ompT ahpC gal</i> $\lambda$ att::pNEB3-r1-cDsbC (Spec <sup>R</sup> , <i>lacI</i> <sup>q</sup> ) $\Delta$ <i>trxB sulA11 R(mcr-73::miniTn10--Tet<sup>S</sup>)2</i> [dcm] <i>R(zgb-210::Tn10--Tet<sup>S</sup>) endA1 <math>\Delta</math>gor <math>\Delta</math>(mcrC-mrr)114::IS10</i> | NEB                                                                                      |
| pET16b_cgl1                              | Plasmid containing <i>cgl1</i>                                                                                                                                                                                                                                                                                            | E. Ricklefs <i>et al.</i> , <i>J Biotechnol</i> <b>2014</b> , 191, 46–53.                |
| pET22ssl1                                | Plasmid containing <i>ssl1</i> with a N-terminal His <sub>6</sub> -tag                                                                                                                                                                                                                                                    | M. Gunne, V. B. Urlacher, <i>PLoS ONE</i> <b>2012</b> , 7, e52360                        |
| pETK316N/D500G                           | Plasmid containing <i>cotA</i> mutant                                                                                                                                                                                                                                                                                     | K. Koschorreck <i>et al.</i> , <i>BMC Biotechnol.</i> <b>2009</b> , 9, 12.               |
| pET28b_psvao                             | Plasmid containing <i>psvao</i> with N-terminal His <sub>6</sub> -tag                                                                                                                                                                                                                                                     | Newlandè von Rooyen, PhD thesis, University of the Free State, Bloemfontein, <b>2012</b> |
| pACYC <sub>tac</sub> _psvao              | Plasmid containing <i>psvao</i>                                                                                                                                                                                                                                                                                           | This study                                                                               |
| pCDF-Duet_syatpr2_his <sub>6</sub>       | Plasmid containing <i>syatpr2</i> with C-terminal His <sub>6</sub> -tag                                                                                                                                                                                                                                                   | This study                                                                               |
| pCDF-Duet_syfiplr                        | Plasmid containing <i>syfiplr</i>                                                                                                                                                                                                                                                                                         | This study                                                                               |
| pCDF-Duet_syfiplr_his <sub>6</sub>       | Plasmid containing <i>syfiplr</i> with C-terminal His <sub>6</sub> -tag                                                                                                                                                                                                                                                   | This study                                                                               |
| pCDF-Duet_psvao_syatpr2_his <sub>6</sub> | Plasmid containing <i>psvao</i> and <i>syatpr2</i>                                                                                                                                                                                                                                                                        | This study                                                                               |
| pCDF-Duet_psvao_syfiplr                  | Plasmid containing <i>psvao</i> and <i>syfiplr</i>                                                                                                                                                                                                                                                                        | This study                                                                               |
