# Supplementary material for: Three-steps in one-pot: whole-cell biocatalytic synthesis of enantiopure (+)- and (−)-pinoresinol via kinetic resolution
Source: PubMed Central journal article supplement (PMC4862135; doi:10.1186/s12934-016-0472-0), 2016-05-09
Supplement: 12934_2016_472_MOESM2_ESM.pdf [file 12934_2016_472_MOESM2_ESM.pdf]

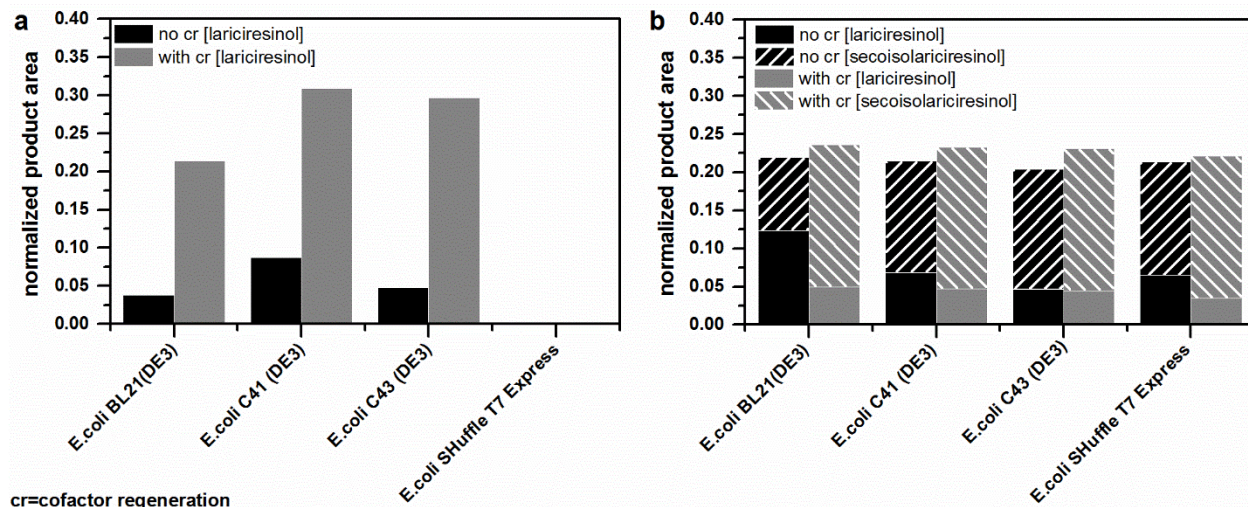

**Additional file 2:** Formation of lariciresinol **4** or secoisolariciresinol **5** from pinoresinol **3** in the reactions with cleared cell lysates of different *E. coli* strains expressing the reductase AtPrR2 **(a)** or the reductase FiPLR **(b)**. Reaction conditions: 50 mM KPi-buffer, pH 7.5, 0.2 mM pinoresinol **3**, 50  $\mu$ l cleared cell lysate containing AtPrR2 or FiPLR, 0.2 mM NADPH. Optionally, 3 U ml<sup>-1</sup> GDH and 20 mM D-glucose were added for cofactor regeneration (cr). The reactions were incubated at 25°C for 16 h. Besides formation of lariciresinol **4** or secoisolariciresinol **5**, no other reaction products were observed.
