# Supplementary material for: Three-steps in one-pot: whole-cell biocatalytic synthesis of enantiopure (+)- and (−)-pinoresinol via kinetic resolution
Source: PubMed Central journal article supplement (PMC4862135; doi:10.1186/s12934-016-0472-0), 2016-05-09
Supplement: 12934_2016_472_MOESM3_ESM.pdf [file 12934_2016_472_MOESM3_ESM.pdf]

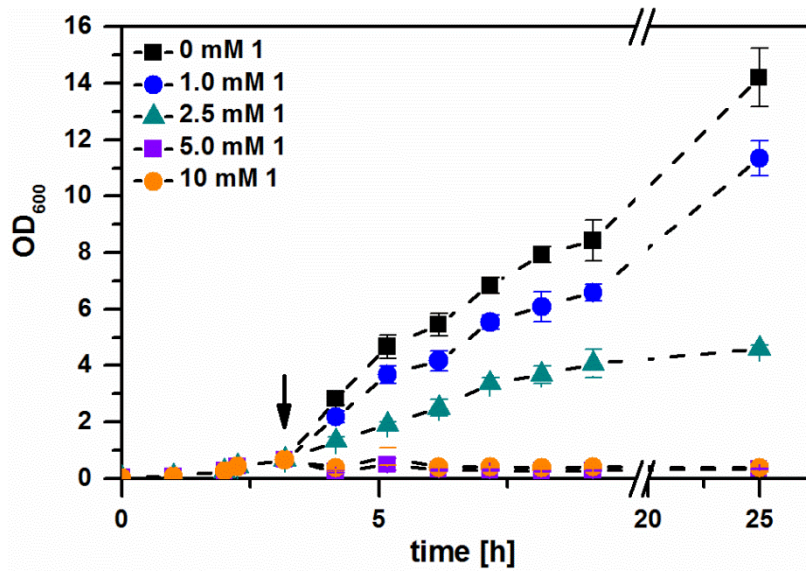

**Additional file 3:** Cell growth of *E. coli* C41(DE3) cells co-transformed with pACYC<sub>tac</sub>\_psvao and pET16b\_cgl1 in the presence of different concentrations of eugenol 1. Cell cultures were grown at 37°C, 180 rpm to an OD<sub>600</sub> of 0.6 and harvested (indicated by an arrow). The cell pellet was resuspended in TB medium, eugenol 1 was added and the cultures were incubated at 37°C, 180 rpm. Cell growth was monitored at 600 nm. Black square: 0 mM eugenol 1, blue circle: 1 mM, green triangle: 2.5 mM, purple square: 5 mM, orange circle: 10 mM.
