# Supplementary material for: Three-steps in one-pot: whole-cell biocatalytic synthesis of enantiopure (+)- and (−)-pinoresinol via kinetic resolution
Source: PubMed Central journal article supplement (PMC4862135; doi:10.1186/s12934-016-0472-0), 2016-05-09
Supplement: 12934_2016_472_MOESM4_ESM.pdf [file 12934_2016_472_MOESM4_ESM.pdf]

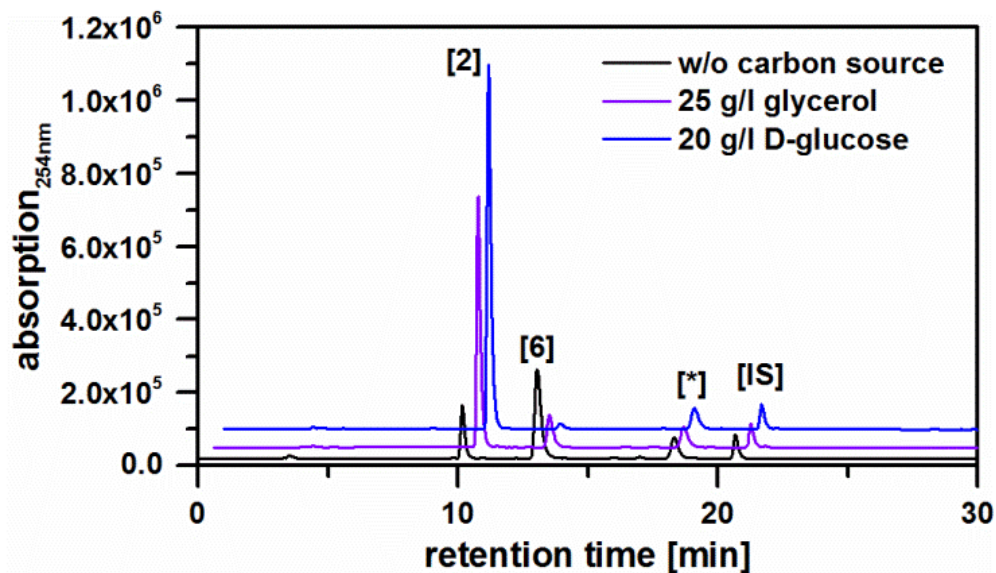

**Additional file 4:** Influence of an energy source on conversion of coniferyl alcohol **2** by *E. coli* whole-cells. 10 ml *E. coli* C41(DE3) transformed with pCDF-Duet resuspended in reaction buffer (70 g l<sup>-1</sup> cww) were supplemented with 1 mM coniferyl alcohol **2**. Optionally, 25 g l<sup>-1</sup> glycerol or 20 g l<sup>-1</sup> D-glucose was added. The reaction was carried out for 24 h at 25°C, 140 rpm. [2] = coniferyl alcohol **2**, [6] = coniferyl aldehyde **6**, [IS] = internal standard FSME, \* = unspecific peak; chromatograms are shifted vertically.
