# Supplementary material for: Three-steps in one-pot: whole-cell biocatalytic synthesis of enantiopure (+)- and (−)-pinoresinol via kinetic resolution
Source: PubMed Central journal article supplement (PMC4862135; doi:10.1186/s12934-016-0472-0), 2016-05-09
Supplement: 12934_2016_472_MOESM6_ESM.pdf [file 12934_2016_472_MOESM6_ESM.pdf]

## Additional file 6: Product identification by NMR and HR/MS.

Nuclear magnetic resonance (NMR) spectra were recorded on a Bruker Avance III (600 MHz) on  $\text{CD}_3\text{COCD}_3$  or  $\text{Cl}_3\text{CD}$  solutions using residual solvent as internal standard. For  $\text{CD}_3\text{COCD}_3$  the chemical shifts were  $\delta = 2.05$  ppm and 2.84 ppm in  $^1\text{H}$ -NMR spectra,  $\delta = 29.84$  ppm, and 206.26 in  $^{13}\text{C}$ -NMR spectra, for  $\text{Cl}_3\text{CD}$   $\delta = 7.26$  ppm in  $^1\text{H}$ -NMR spectra,  $\delta = 77.16$  ppm in  $^{13}\text{C}$ -NMR spectra. Chemical shifts ( $\delta$ ) are reported in parts per million (ppm) relative to the signal of the residual protic solvents.

Coupling constants  $J$  [Hz] were directly taken from the spectra and are not averaged. Splitting patterns are designated as s (singlet), d (doublet), dd (doublet of doublets), ddd (doublet of doublets of doublets) and m (multiplet). Peak assignment was based on correlation experiments. High-resolution mass spectrometry (HR/MS) was recorded on maXis in the positive mode with a scan from 50-1500  $m/z$  and the following settings: Source Type ESI, Set Capillary 4000 V, Set End Plate Offset -500 V, Nebulizer 0.3 Bar, Dry Heater 180 °C, Dry gas 4.0  $\text{l min}^{-1}$ .

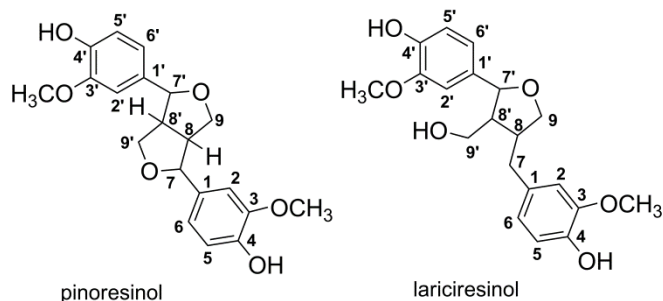

(+)-Pinoresinol (+)-**3a**:  $^1\text{H}$  NMR (600 MHz, Acetone- $d_6$ ):  $\delta = 6.99$  (d,  $^3J$  ( $\text{H}_{2,2'}$ ,  $\text{H}_{6,6'}$ ) = 1.9 Hz, 2H; 2,2'-H), 6.83 (ddd,  $^4J$  ( $\text{H}_{5,5'}$ ,  $\text{H}_{6,6'}$ ) = 8.1,  $^3J$  ( $\text{H}_{2,2'}$ ,  $\text{H}_{6,6'}$ ) = 1.9,  $^4J$  ( $\text{H}_{6,6'}$ ,  $\text{H}_{7,7'}$ ) = 0.7 Hz, 2H; 6,6'-H), 6.79 (d,  $^4J$  ( $\text{H}_{5,5'}$ ,  $\text{H}_{6,6'}$ ) = 8.1 Hz, 2H; 5,5'-H), 4.67 (d,  $^3J$  ( $\text{H}_{7,7'}$ ,  $\text{H}_{8,8'}$ ) = 4.4 Hz, 2H; 7,7'-H), 4.22 – 4.18 (m, 2H; 9,9'-H), 3.84 (s, 6H; 3,3'- $\text{OCH}_3$ ), 3.80 (dd,  $^2J = 9.1$ ,  $^3J$  ( $\text{H}_{8,8'}$ ,  $\text{H}_{9,9'}$ ) = 3.8 Hz, 2H; 9,9'-H), 3.11 – 3.06 (m, 2H);  $^{13}\text{C}$  NMR (151 MHz, Acetone- $d_6$ ):  $\delta = 148.27$  (C-3,3'), 146.77 (C-4,4'), 134.16 (C-1,1'), 119.61 (C-6,6'), 115.46 (C-5,5'), 110.61 (C-2,2'), 86.63 (C-7,7'), 72.21 (C-9,9'),

56.24 (3,3'-OCH<sub>3</sub>), 55.24 (C-8,8'); HRMS (ESI, pos.) calculated for C<sub>20</sub>H<sub>22</sub>NaO<sub>6</sub> [M+Na]<sup>+</sup> m/z: 381.1309, found: 381.1304; ee-value: 96%

(-)-Lariciresinol (-)-**4b**: <sup>1</sup>H NMR (600 MHz, Chloroform-*d*): δ = 6.90 – 6.66 (m, 6H; ArH), 4.78 (d, *J* = 6.6 Hz, 1H; 7'-H), 4.05 (dd, *J* = 8.6, 6.6 Hz, 1H; 9-H), 3.90 (dd, *J* = 10.8, 7.1 Hz, 1H; 9'-H), 3.87 (s, 3H; 3'-OCH<sub>3</sub>), 3.86 (s, 3H; 3-OCH<sub>3</sub>), 3.78 – 3.69 (m, 2H; 9'-H, 9-H), 2.91 (dd, *J* = 13.6, 5.2 Hz, 1H; 7-H), 2.77 – 2.69 (m, 1H, 8-H), 2.54 (dd, *J* = 13.6, 10.7 Hz, 1H; 7-H), 2.43 – 2.37 (m, 1H; 8'-H); <sup>13</sup>C NMR (151 MHz, Chloroform-*d*): δ = 146.77 (C-3'), 146.66 (C-3), 145.15 (C-4'), 144.11 (C-4'), 134.89 (C-1'), 132.40 (C-1), 121.31 (C-6), 118.87 (C-6'), 114.56 (C-5), 114.33 (C-5'), 111.35 (C-2), 108.46 (C-2'), 82.94 (C-7'), 73.01 (C-9), 60.99 (C9'), 56.05 (2xOCH<sub>3</sub>), 52.72 (C-8'), 42.53 (C-8), 33.42(C-7); HRMS (ESI, pos.) calculated for C<sub>20</sub>H<sub>24</sub>NaO<sub>6</sub> [M+Na]<sup>+</sup> m/z: 383.1465, found: 383.1464; ee: 85%

HR/MS results: HR/MS acquisition parameters: (ESI, pos.) m/z calculated for [M+Na]<sup>+</sup>.

| Product No. | Measured m/z | Ion Formula                                      | Calculated m/z | err [ppm] |
|-------------|--------------|--------------------------------------------------|----------------|-----------|
| 3           | 381.1304     | C <sub>20</sub> H <sub>22</sub> NaO <sub>6</sub> | 381.1309       | 1.2       |
| 4           | 383.1464     | C <sub>20</sub> H <sub>24</sub> NaO <sub>6</sub> | 383.1465       | 0.4       |
| 5           | 385.1624     | C <sub>20</sub> H <sub>26</sub> NaO <sub>6</sub> | 385.1622       | -0.5      |
